# Supplementary material
Source: PubMed Central journal article supplement (PMC2888794)
Supplement: NIHMS200935-supplement-1.pdf [file NIHMS200935-supplement-1.pdf]

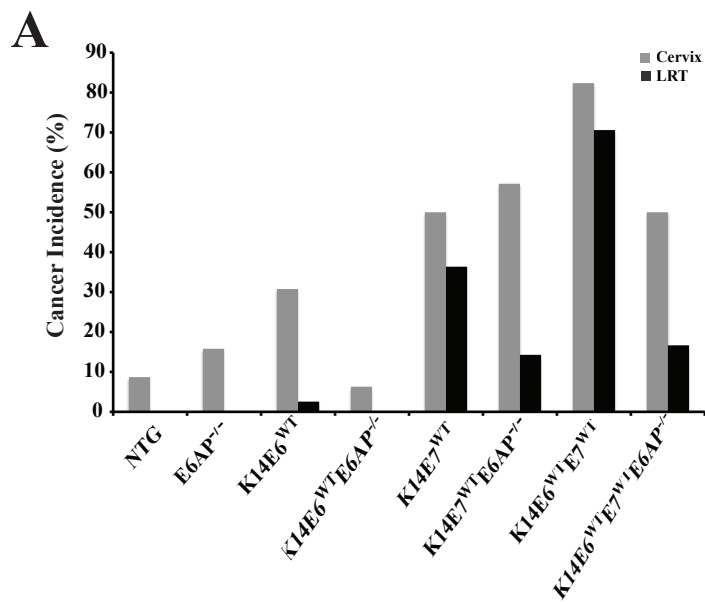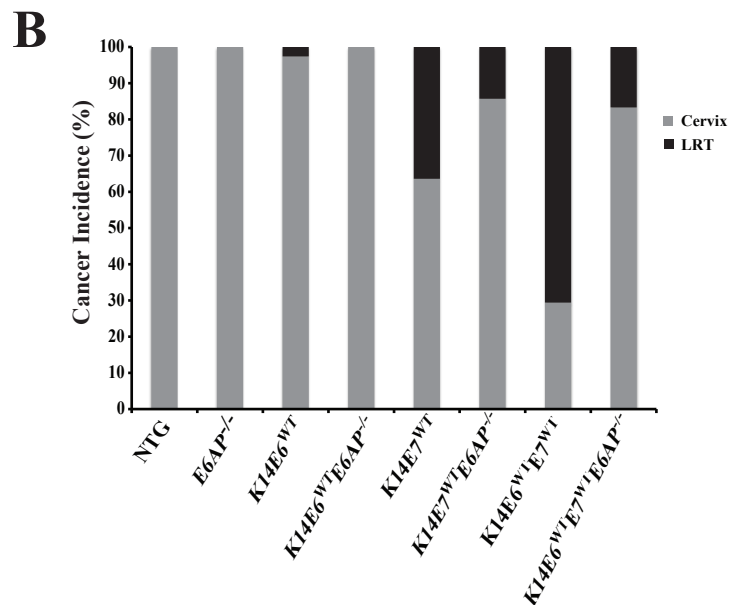

**Supplemental Figure 2. Cancer incidence in the reproductive tract.** A. The graph shows the absolute incidence of cancer based on location, namely, the cervix or the lower reproductive tract across various genotypes. B. The graph shows the relative incidence of cancer by location across various genotypes. *NTG*, *E6AP*<sup>-/-</sup>, *K14E6*<sup>WT</sup> and *K14E6*<sup>WT</sup>*E6AP*<sup>-/-</sup> mice were treated with estrogen for nine months. *K14E7*<sup>WT</sup>, *K14E7*<sup>WT</sup>*E6AP*<sup>-/-</sup>, *K14E6*<sup>WT</sup>*E7*<sup>WT</sup> and *K14E6*<sup>WT</sup>*E7*<sup>WT</sup>*E6AP*<sup>-/-</sup> mice were treated for six months. Note the near complete absence of cancer in the lower reproductive tract in mice expressing HPV *E6* as compared to HPV *E7* expressing mice. Please refer to Tables 1 and 2 for the analysis of the severity of disease in these groups.
